# Supplementary material
Source: publisher figshare collection journal article supplement (https://tandf.figshare.com/ndownloader/files/18005360)
Supplement: Supplementary file 1 [file 18005360]

**Supplementary Tables and Figures.**

**Table S1.** Spearman correlation between the abundance of tRFs in CLASH chimeras, the total cellular fraction of tRFs and the tRNA levels in hydro-tRNAseq (d0, d1 and d2).

**Table S2.** List of the 100 most frequent protein coding targets of tRFs in CLASH chimeras.

**Table S3.** tRFs/miRNAs in chimeras with agotron targets. Known agotrons are reported in [25]. Potential agotrons are defined as short introns (≤150 nts) that are targeted by tRFs at the 5’ border with at most one nt offset. Given the high sequence similarity, some of these miRNAs may be misannotated tRFs.

**Table S4.** Nucleotide distribution for all known agotrons and potential agotrons. Potential agotrons are defined as short introns (≤150 nts) that are targeted by tRFs at the 5’ border. The first 15 nts near the 5’ splice site are shown from 5’ to 3’. The last 15 nts near the 3’ splice site are shown from 3’ to 5’.

**Fig. S1.** Length distribution plots for the less abundant (A) tRF-5, (B) tRF-i and (C) tRF-1, see Fig. 1 for tRF-3.

**Fig. S2.** tRF/agotron interactions. (A) The best secondary structures as predicted by RNAhybrid are shown for interacting tRFs and agotrons with additional of 50 nts upstream and downstream (non-binding sequences are cut to fit the plot size). Vertical bars and arrows indicate the 5' splice sites of the agotrons in the gene sequences. Target sequences of tRFs in chimeras are highlighted. (B) Motif logo in the agotron-targeting tRFs.

**Fig. S3.** Features of guide tRFs identified in tRF/NAT chimeras from CLASH data. (A) Distribution of target regions. (B) Minimum Free Energy (MFE) histogram for tRF/NAT chimeras (green histogram and fitted red line). For comparison, MFE for interactions between tRFs and sense RNAs are shown in blue. (C) tRF length distribution histograms for chimeras with NAT targets.

**Fig. S4.** Target motifs, hybridization patterns and 7-mer conservation in tRFs (6 pages). Motifs found by MEME (left) in the targets of tRFs (right), with the best complementary reverse sequences on tRF identified by FIMO (rectangles in the tRF sequences). The RNAhybrid line shows hybridizing tRF/target nucleotides (thick lines in ≥80%, and thin lines in ≥50% of the targets). Histograms show frequencies of perfect matches for 7-mers starting at each tRF position in genic regions (conserved in 100 animal genomes) and in human genome as a background frequency. Tandem repeats on the genome are excluded. Vertical arrows indicate location of potential target bulges, as detected by GLAM2.

**Fig. S5.** Codon usage in the transcripts targeted by three CysGCA tRF-3 isoforms. Amino acids followed by the codons are shown on the x-axis and the expected values are calculated for all human transcripts as background frequency.

**Supplementary Table 1.**

| Spearman | d0 | d1 | d2 | sRNA-seq |
| --- | --- | --- | --- | --- |
| tRF5 | 0.00 | 0.00 | 0.02 | 0.04 |
| tRFi | -0.01 | -0.02 | -0.02 | 0.07 |
| tRF3 | 0.04 | 0.03 | -0.01 | -0.03 |
| tRF1 | -0.06 | -0.06 | -0.03 | 0.15 |

**Supplementary Table 2.**

| Target Transcript | Coding Targets | Chimera Count | Guide tRNAs |
| --- | --- | --- | --- |
| ENST00000607355.2 | HIST2H2AA4 | 1224 | Leu-TAA-1-1,Glu-CTC-2-1,Asp-GTC-1-1,Val-AAC-6-1,Cys-GCA-1-1,Cys-GCA-14-1,Cys-GCA-12-1,Ser-TGA-1-1,iMet-CAT-1-1,Ser-AGA-2-1,Asp-GTC-3-1,Cys-GCA-20-1,Asp-GTC-2-1,Leu-AAG-4-1 |
| ENST00000394654.3 | RUNDC3B | 703 | Asp-GTC-2-1,Gly-GCC-2-1,Glu-CTC-2-1,Gly-GCC-1-1 |
| ENST00000414069.2 | SPRN | 365 | Leu-CAA-1-1,Gly-CCC-1-1,Gly-GCC-1-1 |
| ENST00000329092.12 | RPL35A | 293 | Thr-AGT-5-1,Thr-AGT-3-1,Thr-AGT-6-1,Ala-AGC-5-1,Ala-AGC-2-1,Thr-TGT-1-1 |
| ENST00000558133.1 | MEX3B | 250 | Asp-GTC-2-1,Glu-CTC-2-1,Gln-CTG-6-1,Glu-TTC-3-1 |
| ENST00000416605.6 | HACE1 | 244 | Glu-TTC-3-1 |
| ENST00000403683.1 | HIST2H3A | 205 | Leu-CAG-1-1,Tyr-GTA-6-1,Gly-CCC-2-1,Gln-CTG-4-1,Arg-TCG-2-1,Gln-TTG-3-1,Gly-TCC-3-1,Ser-CGA-4-1,Ser-AGA-2-1 |
| ENST00000287594.7 | MPV17L | 177 | Val-CAC-3-1,Lys-CTT-3-1,Glu-CTC-2-1,Pro-TGG-3-1,Gln-TTG-3-1,Gln-CTG-6-1,Pro-CGG-2-1,Glu-TTC-3-1 |
| ENST00000255194.10 | AP3B1 | 176 | Glu-TTC-3-1 |
| ENST00000525587.1 | TIMM10 | 142 | Asp-GTC-2-1 |
| ENST00000415136.6 | DDOST | 139 | Leu-TAA-1-1,Glu-CTC-2-1,Cys-GCA-2-4,Leu-AAG-1-1 |
| ENST00000526277.1 | CELF1 | 137 | Gly-CCC-1-1 |
| ENST00000459829.1 | RPL7L1 | 136 | Cys-GCA-17-1,Cys-GCA-14-1,Gln-CTG-6-1 |
| ENST00000620073.4 | HSP90AB1 | 136 | Arg-CCT-2-1,Ile-TAT-2-3,Asp-GTC-2-1,Cys-GCA-14-1,Gly-GCC-1-1 |
| ENST00000592456.1 | SYNGR2 | 134 | Ser-TGA-1-1,Cys-GCA-14-1,Cys-GCA-17-1 |
| ENST00000478753.4 | SEPHS2 | 133 | Arg-TCT-2-1,Asp-GTC-2-1 |
| ENST00000630190.1 | DUSP16 | 133 | Asp-GTC-2-1 |
| ENST00000626119.2 | COPS7A | 131 | mtdbD00000532|Met|CAT |
| ENST00000550458.1 | SRSF9 | 127 | Leu-TAA-1-1,Leu-CAG-1-1 |
| ENST00000368232.8 | GPATCH4 | 124 | Thr-AGT-6-1,Ala-AGC-1-1 |
| ENST00000423698.6 | ERCC1 | 119 | SeC-TCA-1-1,Glu-CTC-2-1,Glu-TTC-3-1 |
| ENST00000567171.1 | TCF25 | 117 | Leu-TAA-1-1 |
| ENST00000407193.5 | RPS14 | 116 | Val-AAC-2-1,Asp-GTC-2-1,Glu-CTC-2-1,Gly-GCC-1-1 |
| ENST00000399794.6 | RBMXL1 | 115 | His-GTG-1-1 |
| ENST00000369425.5 | GPAM | 108 | Val-CAC-3-1,Lys-CTT-3-1,Glu-CTC-2-1,Pro-TGG-3-1,Gln-TTG-3-1,Gln-CTG-6-1 |
| ENST00000370990.5 | SERBP1 | 106 | iMet-CAT-1-1 |
| ENST00000358296.10 | ZNF100 | 104 | Glu-CTC-2-1 |
| ENST00000369839.3 | TAF5 | 102 | Leu-TAA-1-1,Cys-GCA-14-1 |
| ENST00000554636.1 | VTI1B | 101 | Leu-TAA-1-1 |
| ENST00000451283.5 | SLC25A1 | 100 | Gly-CCC-1-1 |
| ENST00000555679.5 | PSMC1 | 98 | Glu-TTC-3-1 |
| ENST00000523929.1 | HSPA9 | 98 | Leu-CAA-1-1 |
| ENST00000429437.5 | RPL35A | 95 | Ala-AGC-5-1,Thr-CGT-1-1,Thr-AGT-6-1,Thr-AGT-5-1,Thr-TGT-1-1 |
| ENST00000342988.7 | SMAD4 | 95 | Lys-TTT-3-1 |
| ENST00000256015.4 | BTG1 | 87 | Asp-GTC-2-1 |
| ENST00000399627.3 | SBF1 | 86 | Arg-CCG-2-1 |
| ENST00000567983.1 | DCTPP1 | 85 | Arg-TCG-1-1,Leu-AAG-1-1 |
| ENST00000535269.1 | KDM5A | 85 | Leu-TAA-1-1 |
| ENST00000280481.8 | FREM2 | 85 | Leu-AAG-3-1,Leu-AAG-1-1 |
| ENST00000285928.2 | LRGUK | 82 | Gln-TTG-3-1,Lys-CTT-3-1,Thr-AGT-6-1,Gln-CTG-6-1 |
| ENST00000552516.5 | TGFBR1 | 81 | Leu-TAA-1-1 |
| ENST00000359193.3 | HIST1H2AG | 79 | Ala-AGC-1-1,Ser-TGA-1-1,Gly-GCC-1-1,Leu-AAG-1-1 |
| ENST00000379719.7 | IPO7 | 78 | Leu-TAA-1-1 |
| ENST00000372616.1 | CTPS1 | 77 | Leu-TAA-1-1 |
| ENST00000324361.9 | FBXL16 | 77 | Ile-TAT-2-3 |
| ENST00000629427.2 | SHPRH | 77 | Cys-GCA-12-1 |
| ENST00000413366.7 | PRKCA | 76 | Gly-CCC-1-1,Glu-TTC-3-1 |
| ENST00000458062.3 | HSPA1B | 74 | Gln-TTG-3-1,Gln-CTG-1-1,Gln-CTG-6-1 |
| ENST00000521479.1 | GSR | 74 | Glu-TTC-3-1 |
| ENST00000528746.5 | PRDM10 | 74 | Leu-AAG-1-1 |
| ENST00000549525.1 | COX6A1 | 74 | Glu-CTC-2-1,Glu-TTC-3-1 |
| ENST00000541166.1 | PWP1 | 73 | Ser-TGA-1-1 |
| ENST00000626067.1 | RACK1 | 72 | Ile-TAT-2-3,Thr-AGT-5-1 |
| ENST00000521381.5 | PIK3R1 | 72 | Cys-GCA-14-1 |
| ENST00000579190.1 | PLXDC1 | 71 | Cys-GCA-14-1 |
| ENST00000314032.8 | UCP3 | 71 | Leu-TAA-1-1,Lys-CTT-3-1,Trp-CCA-2-1,Leu-TAA-2-1,Leu-CAA-1-1 |
| ENST00000618183.4 | HNRNPA2B1 | 70 | Leu-TAA-1-1,Glu-CTC-2-1,Cys-GCA-12-1,Cys-GCA-14-1,Ala-AGC-1-1 |
| ENST00000358739.4 | HIST1H2AI | 68 | Ser-TGA-1-1,Ala-CGC-2-1 |
| ENST00000378665.1 | UQCRQ | 67 | Arg-TCG-2-1 |
| ENST00000560846.1 | BAHD1 | 67 | Leu-TAA-1-1 |
| ENST00000395587.5 | EIF3C | 67 | Leu-TAA-1-1,Cys-GCA-14-1 |
| ENST00000540357.5 | DNMT1 | 66 | Leu-TAA-1-1,Ala-AGC-1-1 |
| ENST00000509860.1 | PRDM16 | 66 | Ile-TAT-2-3 |
| ENST00000368320.7 | KHDC4 | 66 | Arg-TCT-4-1 |
| ENST00000425102.1 | TUBB | 65 | Cys-GCA-1-1,Leu-TAA-1-1,Leu-CAG-1-1,Cys-GCA-14-1,Lys-CTT-3-1 |
| ENST00000282007.7 | ZC3H13 | 64 | Ala-CGC-2-1,Cys-GCA-14-1 |
| ENST00000600596.1 | HNRNPUL1 | 64 | Cys-GCA-14-1 |
| ENST00000389902.7 | RNF216 | 63 | Thr-CGT-2-1 |
| ENST00000246229.4 | PLAGL2 | 62 | Leu-TAA-1-1,Cys-GCA-12-1 |
| ENST00000613252.4 | DACH1 | 62 | Glu-TTC-3-1 |
| ENST00000490734.6 | DBNL | 61 | Ser-GCT-5-1,Glu-CTC-2-1,Gly-GCC-1-1 |
| ENST00000489867.1 | ENO1 | 61 | Cys-GCA-14-1 |
| ENST00000634634.1 | HNRNPR | 61 | Cys-GCA-14-1 |
| ENST00000588582.3 | LSM14A | 61 | Ile-TAT-2-3,Ala-AGC-5-1,Ala-AGC-2-1,Ala-CGC-2-1 |
| ENST00000539332.2 | DDB1 | 60 | Ile-TAT-2-3,His-GTG-1-1 |
| ENST00000544292.5 | PARD3 | 60 | Ala-AGC-5-1,Gly-GCC-1-1 |
| ENST00000393436.9 | RAP1B | 60 | Ala-AGC-1-1 |
| ENST00000373480.1 | KIAA1522 | 60 | Cys-GCA-14-1 |
| ENST00000373715.10 | SRSF3 | 60 | Ala-AGC-2-1,Gly-GCC-1-1 |
| ENST00000377704.4 | MGME1 | 59 | mtdbD00000532|Met|CAT |
| ENST00000514697.1 | PAPD7 | 59 | Asp-GTC-2-1 |
| ENST00000551217.1 | RPLP0 | 58 | Leu-TAG-2-1 |
| ENST00000343813.9 | ICMT | 58 | Arg-TCG-2-1 |
| ENST00000524227.5 | ANK1 | 58 | Ser-AGA-2-1 |
| ENST00000588852.1 | SAFB | 57 | Cys-GCA-14-1,Leu-AAG-1-1 |
| ENST00000291442.3 | NR2F6 | 57 | Asp-GTC-2-1 |
| ENST00000380559.7 | ADAMTSL1 | 56 | mtdbD00000532|Met|CAT |
| ENST00000296289.10 | TKT | 56 | Glu-CTC-2-1,Leu-AAG-1-1 |
| ENST00000262861.8 | SIPA1L2 | 56 | Cys-GCA-14-1 |
| ENST00000261254.7 | CCND2 | 56 | Ser-GCT-1-1,Ser-GCT-2-1 |
| ENST00000258412.7 | TMBIM1 | 56 | Lys-CTT-3-1 |
| ENST00000598742.5 | RPS19 | 56 | Cys-GCA-14-1 |
| ENST00000072644.6 | YIPF1 | 56 | Ala-CGC-2-1 |
| ENST00000440177.6 | ERF | 55 | Cys-GCA-1-1 |
| ENST00000613412.1 | HIST2H4A | 54 | Leu-AAG-1-1 |
| ENST00000327214.5 | FGFR1OP2 | 53 | iMet-CAT-1-1 |
| ENST00000570760.2 | AC120057.3 | 53 | Glu-CTC-1-1 |
| ENST00000268711.3 | MED9 | 53 | Cys-GCA-1-1 |
| ENST00000545241.2 | HSPA1B | 52 | Thr-CGT-3-1,Ser-CGA-4-1,Arg-TCG-2-1,Ser-CGA-2-1,Cys-GCA-14-1,Cys-GCA-12-1,Ala-CGC-2-1,Ala-AGC-2-1,Ile-GAT-1-1,Asp-GTC-2-1 |
| ENST00000633762.1 | TAF15 | 52 | Leu-TAA-1-1,Ala-AGC-2-1,Cys-GCA-14-1,Leu-AAG-1-1 |

**Supplementary Table 3.**

| Gene | Transcript | Intron number | Intron length | 5’ distance | known agotron | tRF/miRNA | tRF/miRNA sequence |
| --- | --- | --- | --- | --- | --- | --- | --- |
| BRD4 | ENST00000263377 | 18 | 78 | 0 | yes | LeuCAA-001-N-3p-92-109 | ATCCCACTTCTGACACCA |
| BRD4 | ENST00000263377 | 17 | 127 | 0 | no | ThrAGT-006-N-3p-60-76 | ATCCCAGCGGGGCCTCC |
| CC2D1B | ENST00000284376 | 10 | 92 | 1 | no | LeuAAG-001-N-3p-68-85 | ATCCCACCGCTGCCACCA |
| CPSF1 | ENST00000616140 | 25 | 97 | 0 | yes | SerTGA-001-N-3p-68-85 | ACCCTGCTCGCTGCGCCA |
| DPP9 | ENST00000598041 | 1 | 101 | -1 | no | ValCAC-003-N-3p-53-73 | GTTCGATCCCGGGCGGAAACA |
| ELOVL1 | ENST00000372458 | 6 | 81 | 0 | no | LeuCAG-001-N-3p-69-86 | ATCCCACTCCTGACACCA |
| HUWE1 | ENST00000342160 | 63 | 76 | 0 | no | LeuTAA-001-N-3p-69-86/  hsa-mir-4286 | ACCCCACTCCTGGTACCA/  ACCCCACTCCTGGTACC |
| HUWE1 | ENST00000342160 | 63 | 76 | 0 | no | GluCTC-002-N-Mi-37-54 | ACCGCCGCGGCCCGGGTT |
| JMJD8 | ENST00000412368 | 7 | 79 | 0 | no | AlaAGC-001-N-3p-58-75 | TCCCCAGTACCTCCACCA |
| PIDD1 | ENST00000524486 | 11 | 88 | 0 | no | LeuTAG-002-N-3p-68-85/  hsa-mir-1260b | ATCCCACCACTGCCACCA/  ATCCCACCACTGCCACCAT |
| PKD1 | ENST00000262304 | 36 | 72 | 1 | yes | AlaAGC-002-N-3p-58-75 | TCCCCGGCACCTCCACCA |
| PKD1 | ENST00000262304 | 36 | 72 | 1 | yes | hsa-mir-331 | CCCCTGGGCCTATCCTAGAA |
| PKD1 | ENST00000262304 | 36 | 72 | 1 | yes | has-mir-484 | TCAGGCTCAGTCCCCTCCCGAT |
| POLE | ENST00000320574 | 37 | 108 | 0 | no | GluCTC-002-N-Mi-36-53 | CACCGCCGCGGCCCGGGT |
| GRK6 | ENST00000355472 | 10 | 92 | 0 | no | ArgTCT-002-N-3p-74-91 | ATCCCACCAGAGTCGCCA |
| LMNA | ENST00000347559 | 6 | 92 | -1 | yes | GlyGCC-001-N-3p-58-74 | TCCCGGCCCATGCACCA |
| RAD9A | ENST00000307980 | 6 | 86 | 0 | no | AlaAGC-001-N-3p-58-75 | TCCCCAGTACCTCCACCA |
| RRP36 | ENST00000244496 | 5 | 107 | 0 | yes | LeuTAG-002-N-3p-68-84/  hsa-mir-1260b | ATCCCACCACTGCCACC/  ATCCCACCACTGCCACCAT |
| RRP36 | ENST00000244496 | 5 | 107 | 0 | yes | LeuAAG-001-N-3p-68-84 | ATCCCACCGCTGCCACC |
| RRP36 | ENST00000244496 | 5 | 107 | 0 | yes | LeuCAG-001-N-3p-69-86 | ATCCCACTCCTGACACCA |
| SLC4A2 | ENST00000392826 | 5 | 89 | 0 | no | LeuTAA-001-N-3p-69-86/  hsa-mir-4286 | ACCCCACTCCTGGTACCA/  ACCCCACTCCTGGTACC |
| SLC4A2 | ENST00000392826 | 5 | 89 | 0 | no | LeuCAG-001-N-3p-69-86 | ATCCCACTCCTGACACCA |
| SLC4A2 | ENST00000392826 | 5 | 89 | 0 | no | AlaAGC-005-N-3p-58-74 | TCCCCAGCACCTCCACC |
| PTCH2 | ENST00000372192 | 20 | 74 | 0 | yes | hsa-mir-6747 | TCCTGCCTTCCTCTGCACCAG |
| TBL3 | ENST00000332704 | 5 | 90 | 0 | yes | hsa-mir-25 | CATTGCACTTGTCTCGGTCTGA |
| SLC9A1 | ENST00000263980 | 7 | 114 | 0 | no | SerAGA-002-N-3p-68-85 | ATCCTGCCGACTACGCCA |
| SMARCC2 | ENST00000550164 | 24 | 80 | 0 | no | LeuAAG-001-N-3p-68-85 | ATCCCACCGCTGCCACCA |
| XRCC1 | ENST00000262887 | 13 | 94 | 0 | no | MetCAT-008-M-3p-52-71 | ATACCCTTCCCGTACTACCA |

**Supplementary Table 4.**

| From 5’ border | A (%) | U (%) | C (%) | G (%) | From 3’ border | A (%) | U (%) | C (%) | G (%) |
| --- | --- | --- | --- | --- | --- | --- | --- | --- | --- |
| 1 | 0 | 0 | 0 | 100 | 1 | 0.99 | 0 | 0 | 99.01 |
| 2 | 0 | 100 | 0 | 0 | 2 | 99.01 | 0 | 0.99 | 0 |
| 3 | 31.68 | 0.99 | 5.94 | 61.39 | 3 | 0.99 | 8.91 | 90.10 | 0 |
| 4 | 55.45 | 11.88 | 6.93 | 25.74 | 4 | 20.79 | 14.85 | 45.54 | 18.81 |
| 5 | 0.99 | 1.98 | 0.99 | 96.04 | 5 | 3.96 | 28.71 | 63.37 | 3.96 |
| 6 | 6.93 | 32.67 | 29.70 | 30.69 | 6 | 4.95 | 19.80 | 64.36 | 10.89 |
| 7 | 21.78 | 10.89 | 22.77 | 44.55 | 7 | 1.98 | 26.73 | 63.37 | 7.92 |
| 8 | 14.85 | 16.83 | 25.74 | 42.57 | 8 | 8.91 | 24.75 | 49.50 | 16.83 |
| 9 | 11.88 | 11.88 | 23.76 | 52.48 | 9 | 5.94 | 28.71 | 48.51 | 16.83 |
| 10 | 10.89 | 15.84 | 18.81 | 54.46 | 10 | 4.95 | 33.66 | 48.51 | 12.87 |
| 11 | 16.83 | 12.87 | 21.78 | 48.51 | 11 | 5.94 | 36.63 | 47.52 | 9.90 |
| 12 | 12.87 | 13.86 | 24.75 | 48.51 | 12 | 3.96 | 34.65 | 46.53 | 14.85 |
| 13 | 12.87 | 21.78 | 25.74 | 39.60 | 13 | 8.91 | 31.68 | 43.56 | 15.84 |
| 14 | 19.80 | 13.86 | 24.75 | 41.58 | 14 | 2.97 | 34.65 | 48.51 | 13.86 |
| 15 | 14.85 | 27.72 | 26.73 | 30.69 | 15 | 11.88 | 30.69 | 44.55 | 12.87 |


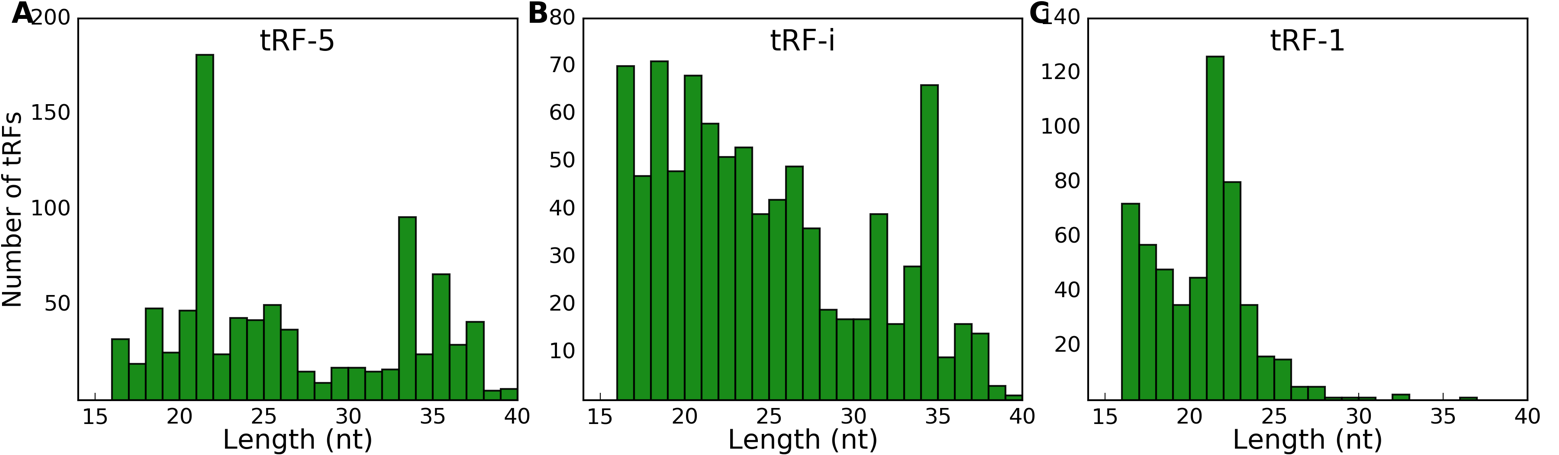


**Fig. S1.** Length distribution plots for the less abundant tRF-5, tRF-i and tRF-1.

| **A** | **B**  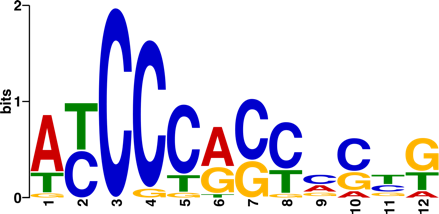 |
| --- | --- |

**Fig. S2.** tRF/agotron interactions.


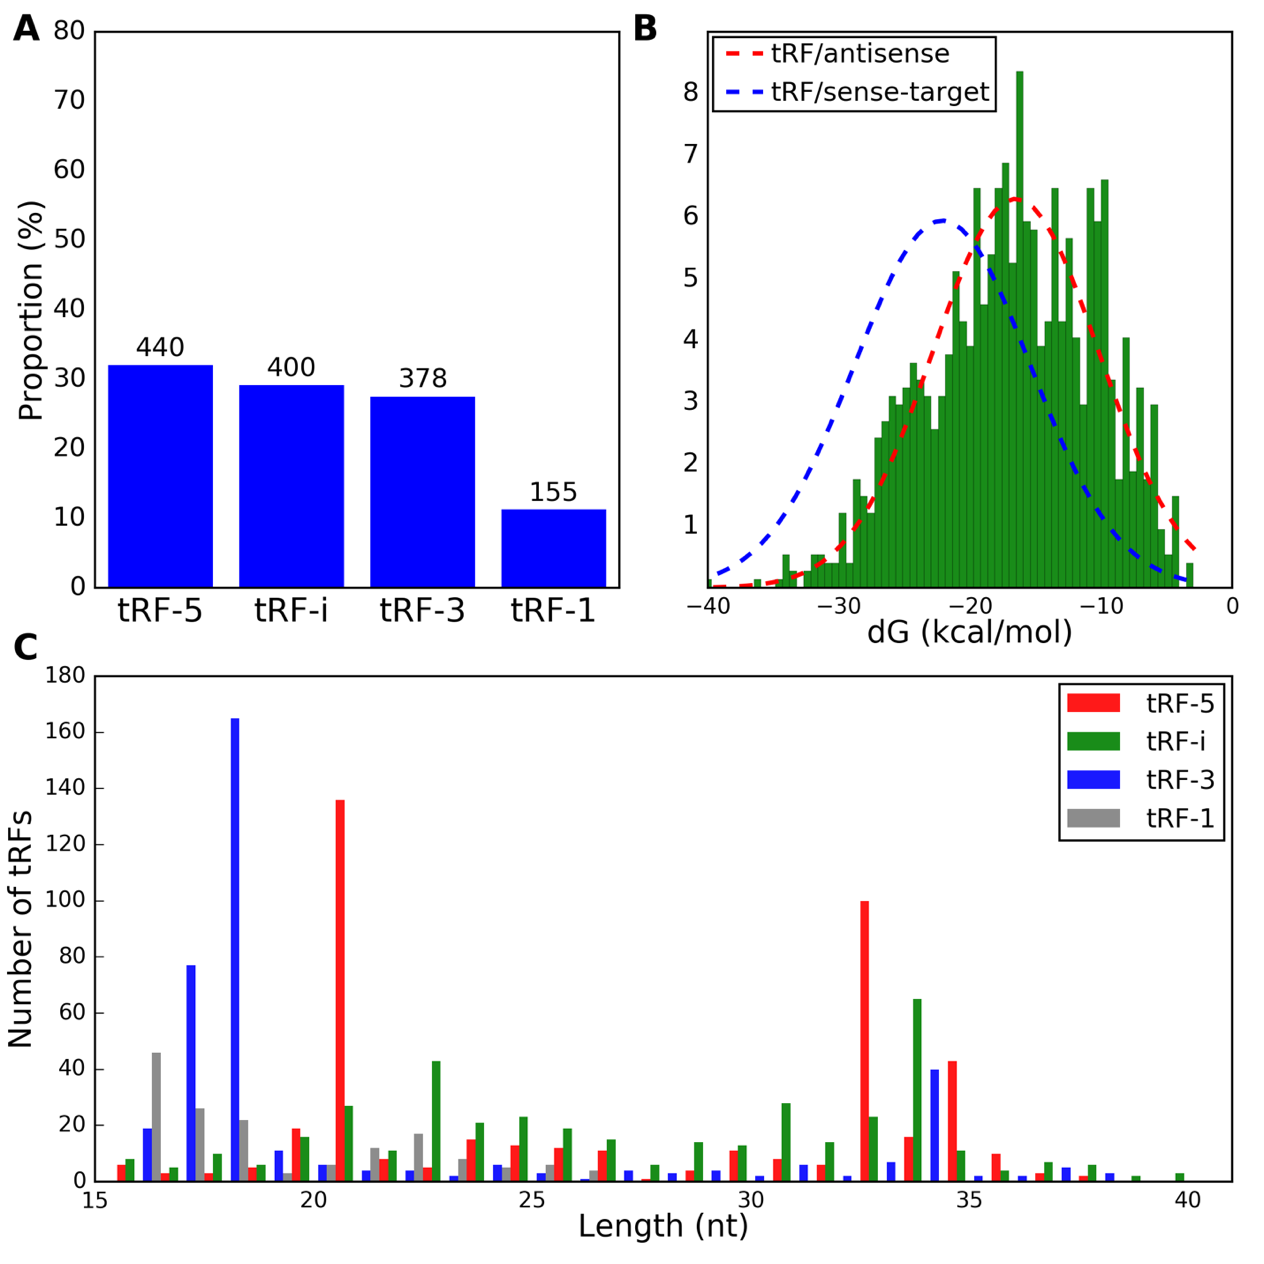


**Fig. S3.** Distribution of guide tRFs identified in tRF/NAT chimeras from CLASH data.

**Fig. S4.** Target hybridization patterns and 7-mer conservation in tRFs.


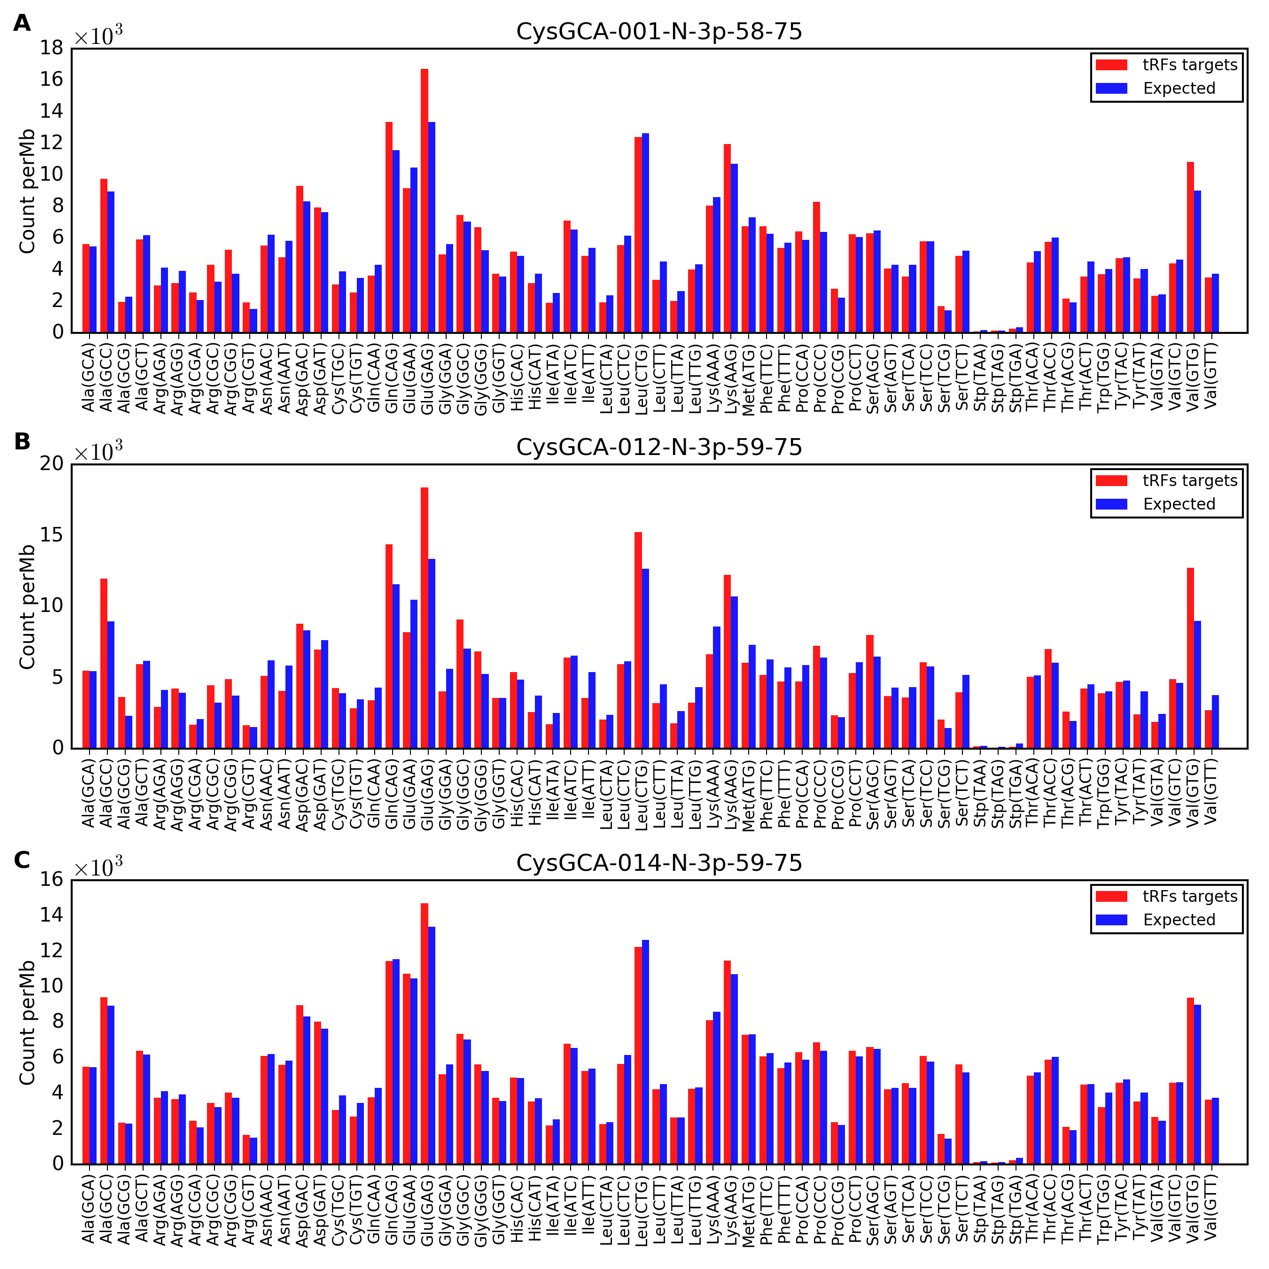


**Fig. S5.** Codon usage for the transcripts targeted by three CysGCA tRF-3 isoforms.
